# Supplementary material
Source: MDPI journal article supplement (https://www.mdpi.com/2075-4442/10/12/343)
Supplement: s1 [file s1]

## Supporting Information

### Contents

**Figure S1.** TEM micrographs of modified Ag.

**Figure S2.** TEM micrographs of modified Ag with different shell thicknesses.

**Figure S3.** coefficients of friction for samples with different shell thicknesses.

(\***Annotation:** All dimensions in the text are intermediate values of the observation results.)

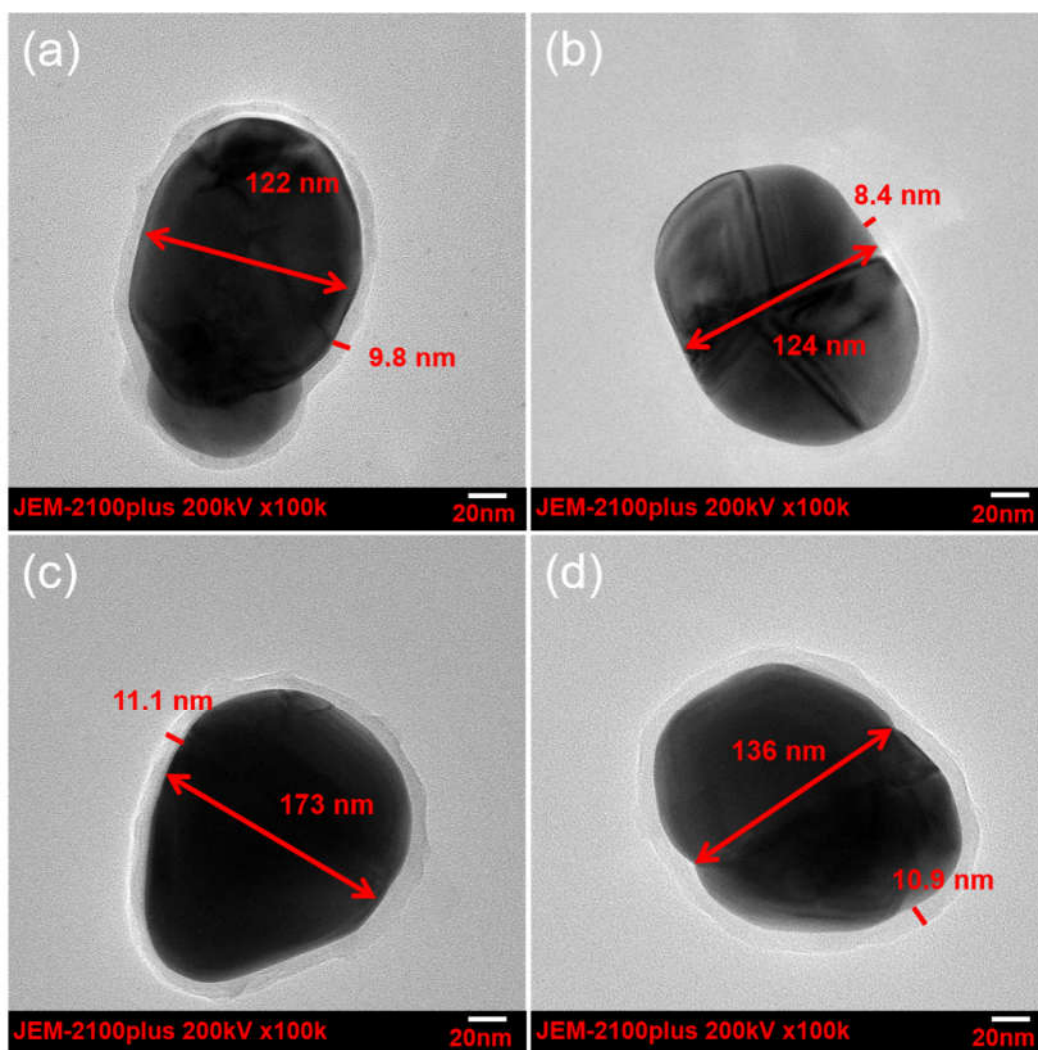

**Figure S1.** TEM micrographs of modified Ag.

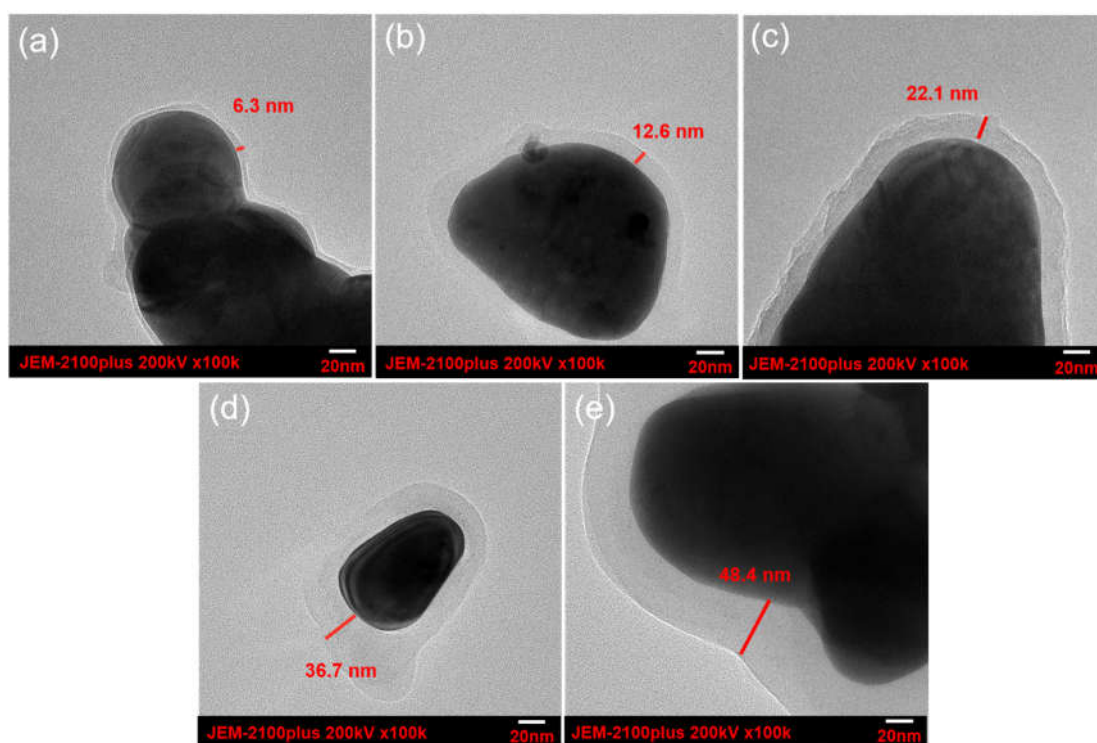

**Figure S2.** TEM micrographs of modified Ag with different shell thicknesses

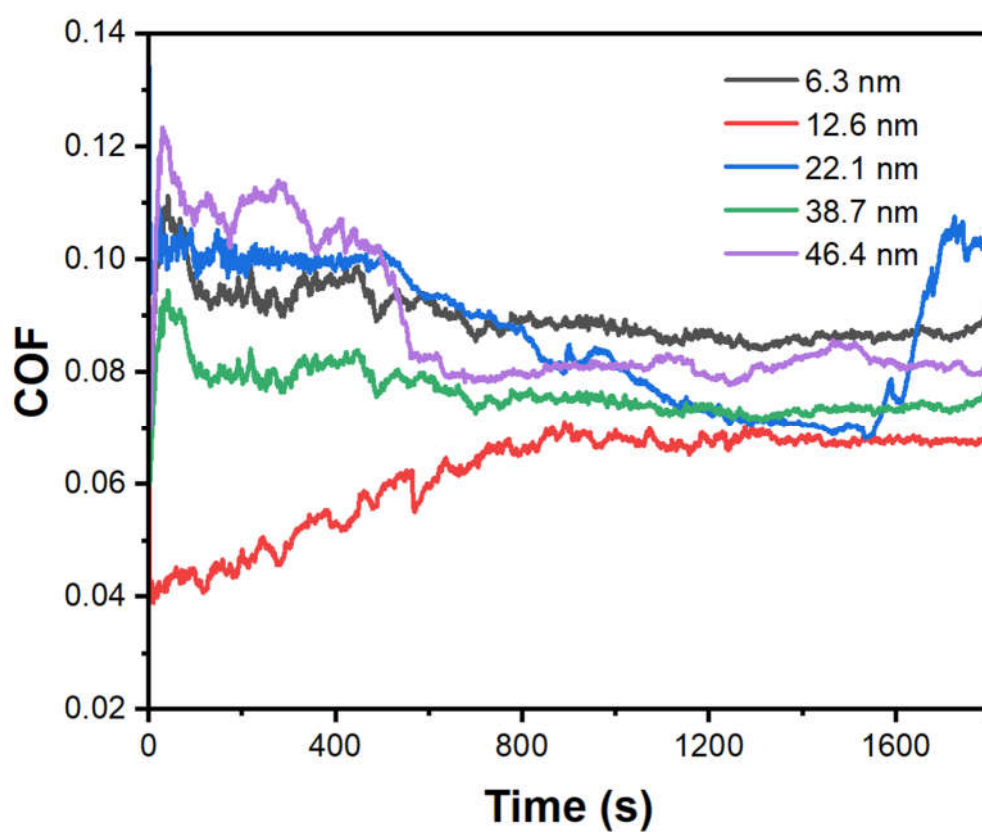

**Figure S3.** coefficients of friction for samples with different shell thicknesses.
